# Supplementary material for: An iterative strategy combining biophysical criteria and duration hidden Markov models for structural predictions of Chlamydia trachomatis σ66 promoters
Source: Springer Nature journal article supplement (doi:10.1186/1471-2105-10-271), 2009-08-28
Supplement: 12859_2009_3001_MOESM8_ESM.pdf [file 12859_2009_3001_MOESM8_ESM.pdf]

Original TS hexamer-spacer-hexamer sequences

Create extended5\_sequences:

A file where each original TS sequence has been extended by 5 nts on each side

**durahmmer** creates a duration HMM from TS sequences

**hmmsearch** identifies highest scoring instance of duration HMM in extended5\_sequences

For each sequence in TS:

If highest scoring instance  $\neq$  TS sequence, TS sequence is replaced by highest scoring sequence

**Duration HMM**

HMM\_SCORE, START & END for any 32-mer

Repeat until stable
