# Supplementary material for: An iterative strategy combining biophysical criteria and duration hidden Markov models for structural predictions of Chlamydia trachomatis σ66 promoters
Source: Springer Nature journal article supplement (doi:10.1186/1471-2105-10-271), 2009-08-28
Supplement: 12859_2009_3001_MOESM9_ESM.pdf [file 12859_2009_3001_MOESM9_ESM.pdf]

**Training Set (TS<sub>29</sub>):  
29 verified promoters**

- For each TS<sub>29</sub> gene, create over-lapping 32-mers for the 600 nt upstream region
- Identify promoter & non-promoter 32-mers
- Generate potential predictor variables 1-6 (all but HMM\_SCORE) for all 32-mers

**Using current TS, iterate duration  
HMM to generate HMM\_SCOREs**

**Stepwise Binary Logistic Regression**

To ensure non-redundant observations,  
select cases where END=32

Classification Function (Model)  
 $u = b_0 + b_1v_1 + b_2v_2 + \dots + b_iv_i$   
where  $i$  is the number of steps

Probability of being a promoter  
 $P = 1/(1 + e^{-u})$

**Use Model for genome-wide prediction**

For cases where  
PROMOTER = 1, if  $P <$   
retention threshold, delete  
promoter from training set  
and create new current TS
