# Supplementary material for: An iterative strategy combining biophysical criteria and duration hidden Markov models for structural predictions of Chlamydia trachomatis σ66 promoters
Source: Springer Nature journal article supplement (doi:10.1186/1471-2105-10-271), 2009-08-28
Supplement: 12859_2009_3001_MOESM10_ESM.pdf [file 12859_2009_3001_MOESM10_ESM.pdf]

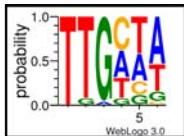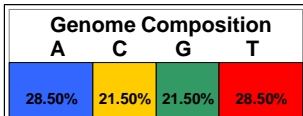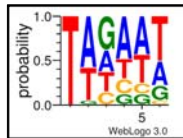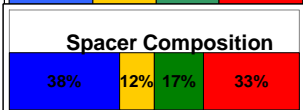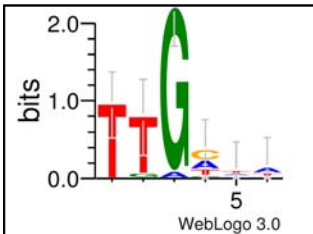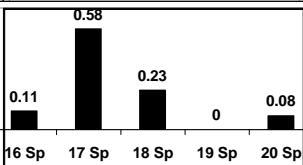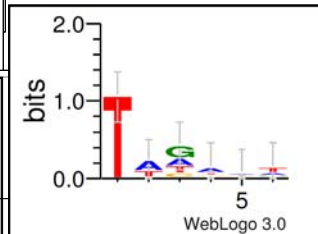

**-35 Hexamer**

**Variable Spacer**

**-10 Hexamer**
